# Supplementary material
Source: MDPI journal article supplement (https://www.mdpi.com/2071-1050/6/1/336)
Supplement: s1 [file s1]

## **Acknowledgments**

The author acknowledges financial support by Deutsche Forschungsgemeinschaft and Ruprecht-Karls-Universität Heidelberg within the funding programme Open Access Publishing.
